# Supplementary material for: Identification and Mode of Action of a Plant Natural Product Targeting Human Fungal Pathogens
Source: PubMed Central journal article supplement (PMC5571344; doi:10.1128/aac.00829-17), 2017-08-24
Supplement: AAC.00829-17_zac009176507s1.pdf [file AAC.00829-17_zac009176507s1.pdf]

## Supplementary Tables

**Table S1: List of the 209 NPs that were screened for antifungal activities against *C. albicans*.**

| Name                                     | Fraction | Source                    | CAS number  | Type of molecule |
|------------------------------------------|----------|---------------------------|-------------|------------------|
| 2-Anthracenecarboxylic acid              | F79B     | <i>Morinda tomentosa</i>  | 117-78-2    | anthraquinone    |
| morindone                                | F102-103 | <i>Morinda tomentosa</i>  | 478-29-5    | anthraquinone    |
| 2-hydroxy-3-methyl- anthraquinone        | F85      | <i>Morinda tomentosa</i>  | 17241-40-6  | anthraquinone    |
| iridoid glycoside scandoside             | F7       | <i>Morinda tomentosa</i>  | -           | anthraquinone    |
| lucidin primeveroside                    | F52      | <i>Morinda tomentosa</i>  | 9706-59-0   | anthraquinone    |
| rubiadin primveroside                    | F53      | <i>Morinda tomentosa</i>  | 26388-47-6  | anthraquinone    |
| damnacanthole                            | F61A     | <i>Morinda tomentosa</i>  | 477-83-8    | anthraquinone    |
| 2-hydroxymethyl-1-methoxyl-anthraquinone | F61B     | <i>Morinda tomentosa</i>  | -           | anthraquinone    |
| alizarin-1-methyl ether                  | F68-69   | <i>Morinda tomentosa</i>  | 6170 06 5   | anthraquinone    |
| morindone 3-O- $\beta$ -primeveroside    | F71-73   | <i>Morinda tomentosa</i>  | 60450-21-7  | anthraquinone    |
| rubiadine-1-methyl ether                 | F79A     | <i>Morinda tomentosa</i>  | 7460-43-7   | anthraquinone    |
| lucidine $\omega$ -methyl ether          | F90-91   | <i>Morinda tomentosa</i>  | -           | anthraquinone    |
| tectoquinone                             | F99A     | <i>Morinda tomentosa</i>  | 84-54-8     | anthraquinone    |
| soranjidiol                              | F99b     | <i>Morinda tomentosa</i>  | 518-73-0    | anthraquinone    |
| morindoquinone                           | F105     | <i>Morinda tomentosa</i>  | -           | anthraquinone    |
| hydroxy-2-methylantraquinone             | F107     | <i>Morinda tomentosa</i>  | 6268 09 3   | anthraquinone    |
| avocadyne                                | F16      | <i>Persea americana</i>   | 24607-05-4  | fatty alcohol    |
| avocadène                                | F19      | <i>Persea americana</i>   | 24607-08-7  | fatty alcohol    |
| avocadyne acetate                        | -        | <i>Persea americana</i>   | -           | fatty alcohol    |
| avocadene acetate                        | -        | <i>Persea americana</i>   | -           | fatty alcohol    |
| alpha-hederin                            | -        | <i>Schefflera systila</i> | 27013-91-8  | saponin          |
| plumbagin                                | -        | Sigma                     | 481-42-5    | naphtoquinone    |
| alpha-hederin                            | -        | Sigma                     | 27013-91-8  | saponin          |
| Combretastatin A4                        | -        | Sigma                     | 117048-59-6 | stilbene         |

| Name                                                                                                                           | Fraction | Source                            | CAS number   | Type of molecule           |
|--------------------------------------------------------------------------------------------------------------------------------|----------|-----------------------------------|--------------|----------------------------|
| arjunolic acid                                                                                                                 | -        | <i>Conostegia speciosa</i>        | 465-00-9     | triterpene                 |
| Tovopyrifolin C                                                                                                                | N°33     | <i>Monnina obtusifolia</i>        | 34211-53-5   | xanthone                   |
| Glc-3medicagenic acid                                                                                                          | N°58     | <i>Dolichos kilimandscharicus</i> | -            | saponin                    |
| 9H-Xanthen-9-one, 1,4,5-trihydroxy-3-(3-methyl-2-buten-1-yl)-                                                                  | N°117    | <i>Garcinia livingstonei</i>      | 136364-72-2  | xanthone                   |
| 9H-Xanthen-9-one, 1,7-dihydroxy-4-methoxy-                                                                                     | N°122    | <i>Polygala nyikensis</i>         | 87339-76-2   |                            |
| Phenol, 4-(3,4-dihydro-7-methoxy-2H-1-benzopyran-2-yl)-2-methoxy-                                                              | N°155    | <i>Mariscus psilostachys</i>      | 116498-59-0  |                            |
| 2-Propen-1-one, 1-(2,4-dihydroxy-6-methoxy-3,5-dimethylphenyl)-3-phenyl-                                                       | N°190    | <i>Myrica serrata</i>             | 65349-31-7   |                            |
| monotesone A                                                                                                                   | N°338    | <i>Monotes engleri</i>            | 208596-55-8  | flavanone                  |
| Prenyletin methyl ether                                                                                                        | N°343    | <i>Vepris dicarpella</i>          | 13544-37-1   | coumarin                   |
| O-Methyllawsone                                                                                                                | N°345    | <i>Swaertia calycina</i>          | 2348-82-5    | naphtoquinone              |
| thymol                                                                                                                         | N°551    | <i>Mosla chinensis</i>            | 89-83-8      | monoterpene                |
| negletein                                                                                                                      | N°552    | <i>Mosla chinensis</i>            | 29550-13-8   | flavanone                  |
| 1-Naphthalenecarboxylic acid, 5-[2-(3-furanyl)-2-oxoethyl]decahydro-1,4a-dimethyl-6-methylene-, methyl ester, (1R,4aS,5R,8aS)- | N°629    | <i>Potamogeton pectinatus</i>     | 329371-63-3  |                            |
| cuspidiol                                                                                                                      | N°697    | <i>Fagara zanthoxyloides</i>      | 51593-96-5   | monomeric phenyl propanoid |
| 8-Acetyldihydronitidine                                                                                                        | N°701    | <i>Fagara zanthoxyloides</i>      | 80330-39-8   |                            |
| Dihydrochelyerythrine                                                                                                          | N°705    | <i>Fagara zanthoxyloides</i>      | 6880-91-7    | alkaloids                  |
| Swartziarboreol B                                                                                                              | F-58     | <i>Swartzia simplex</i>           | 173357-22-7  | cassane diterpene          |
| simplexene B                                                                                                                   | F-72     | <i>Swartzia simplex</i>           | New          | cassane diterpene          |
| simplexene D                                                                                                                   | 82.A     | <i>Swartzia simplex</i>           | New          | cassane diterpene          |
| 11,12-dihydroxy-15,16-dihydroswartziarboreol C                                                                                 | ss F-83  | <i>Swartzia simplex</i>           | 1016630-54-8 | cassane diterpene          |
| Swartziarboreol E                                                                                                              | ss F-35  | <i>Swartzia simplex</i>           | 173357-25-0  | cassane diterpene          |
| Swartziarboreol A                                                                                                              | ss F-51  | <i>Swartzia simplex</i>           | 173357-21-6  | cassane diterpene          |

| Name                                                                                                                 | Fraction       | Source                          | CAS number   | Type of molecule    |
|----------------------------------------------------------------------------------------------------------------------|----------------|---------------------------------|--------------|---------------------|
| 11,12-dihydroxy-8,11,13,15-cassatetraen-17,16-olide                                                                  | ss F-94.G      | <i>Swartzia simplex</i>         | -            | cassane diterpene   |
| dehydroabiatic acid (15B)                                                                                            | PD-139         | <i>Plagiochila delavayi</i>     | 1740-19-8    | diterpene           |
| diplophyllolide A                                                                                                    | F15(b)<br>Poly | <i>Chiloscyphus polyanthus</i>  | 56632-84-9   | diterpene           |
| waltherione G                                                                                                        | F66-1          | <i>Waltheria Indica</i>         | -            | quinoline alkaloids |
| waltherione F                                                                                                        | F76            | <i>Waltheria Indica</i>         | -            | quinoline alkaloids |
| 8-deoxoantidesmone                                                                                                   | F49            | <i>Waltheria Indica</i>         | -            | quinoline alkaloids |
| waltherione E                                                                                                        | F61            | <i>Waltheria Indica</i>         | -            | quinoline alkaloids |
| pterostilbene                                                                                                        | -              | commercial                      | 537-42-8     | stilbene            |
| hederagenin commercial                                                                                               | -              | extrasyntèse                    | 465-99-6     | triterpene          |
| simplexene A                                                                                                         | 67.B3          | <i>Swartzia simplex</i>         | -            | cassane diterpene   |
| (5 <i>S</i> ,10 <i>S</i> )-11,15( <i>S</i> )-dihydroxy-12-methoxyswartziarboreol G                                   | 67.B4          | <i>Swartzia simplex</i>         | 1830306-56-3 | cassane diterpene   |
| 15,16-Dihydroswartziarboreol C                                                                                       | 58.C           | <i>Swartzia simplex</i>         | 864179-56-6  | cassane diterpene   |
| saponin FLO A                                                                                                        | -              | <i>Swartzia simplex</i> leaves  |              | saponin             |
| Lapachol                                                                                                             | -              | commercial                      | 84-79-7      | naphthoquinone      |
| Pulsatilla saponin D                                                                                                 | Fr28           | <i>Odontatenia puncticulosa</i> | 68027-15-6   | saponin             |
| 3β-O-[β-D-xylopyranosyl-(1→3)]-α-L-rhamnopyranosyl-(1→2)-[β-D-glucopyranosyl-(1→4)]-α-L-arabinopyranosyl]hederagenin | Fr30           | <i>Odontatenia puncticulosa</i> | -            | saponin             |
| Afrormosine                                                                                                          | -              | <i>Swartzia simplex</i>         | 550-79-8     | Flavonoid           |
| simplexene C                                                                                                         | -              | <i>Swartzia simplex</i>         | New          | cassane diterpene   |
| Swartziarboreol C                                                                                                    | -              | <i>Swartzia simplex</i>         | 173357-23-8  | cassane diterpene   |
| simplexene E                                                                                                         | -              | <i>Swartzia simplex</i>         | New          | cassane diterpene   |
| Lucidin                                                                                                              | -              | Phytolab                        | 21087-77-4   | anthraquinone       |
| Urushiol (15:3)                                                                                                      | -              | Phytolab                        | 478-08-0     | phenol              |
| Rubiadin -                                                                                                           | -              | Phytolab                        | 83543-37-7   | anthraquinone       |

| <b>Name</b>              | <b>Fraction</b> | <b>Source</b> | <b>CAS number</b> | <b>Type of molecule</b>     |
|--------------------------|-----------------|---------------|-------------------|-----------------------------|
| Anisodamine hydrobromide | -               | Phytolab      | 55449-49-5        | alkaloids                   |
| Chrysophanol             | -               | Phytolab      | 481-74-3          | anthraquinone               |
| Dictamnine               | -               | Phytolab      | 484-29-7          | furoquinoline alkaloid      |
| Garcinone C              | -               | Phytolab      | 76996-27-5        | xanthone                    |
| Indirubin                | -               | Phytolab      | 479-41-4          | Indol alkaloid              |
| 6-Gingerol               | -               | Phytolab      | 23513-14-6        | aryl-alcanones              |
| quercetrin 7-O-gucoside  | -               | Phytolab      | 491-50-9          | flavonol                    |
| Muscimol                 | -               | Phytolab      | 2763-96-4         | isoxazole                   |
| Neoandrographolide       | -               | Phytolab      | 27215-14-1        | diterpene                   |
| Anisodine hydrobromide   | -               | Phytolab      | 76822-34-9        | tropanic alkaloid           |
| Cimifugin                | -               | Phytolab      | 37921-38-3        | Chromone                    |
| Dihydrocapsaicin         | -               | Phytolab      | 19408-84-5        | Amide                       |
| Garcinone D              | -               | Phytolab      | 107390-08-9       | xanthone                    |
| dihydrotanshinone I      | -               | Phytolab      | 87205-99-0        | diterpene                   |
| 8-Gingerol               | -               | Phytolab      | 23513-08-8        | aryl-alcanones              |
| Rubiadin                 | -               | Phytolab      | 117-02-2          | anthraquinone               |
| Rubiadin 1-methyl ether  | -               | Phytolab      | 7460-43-7         | anthraquinone               |
| Obacunone                | -               | Phytolab      | 751-03-1          | limonoide                   |
| Arecoline hydrobromide   | -               | Phytolab      | 300-08-3          | pyridimique alcaloid        |
| Coptisin chloride        | -               | Phytolab      | 6020-18-4         | benzylisoquinoline alkaloid |
| Dihydroberberine         | -               | Phytolab      | 483-15-8          | benzylisoquinoline alkaloid |
| Corynoline               | -               | Phytolab      | 18797-79-0        | benzylisoquinoline alkaloid |
| Cryptotanshinone         | -               | Phytolab      | 35825-57-1        | diterpene                   |
| Swertiamarine            | -               | Phytolab      | 17388-39-5        | secoiridoid                 |
| Ruscogenin               | -               | Phytolab      | 472-11-7          | triterpene                  |
|                          | -               | Phytolab      | 15619-74-9        |                             |
| Aristolactam             | -               | Phytolab      | 13395-02-3        | benzylisoquinoline alkaloid |

| <b>Name</b>                                          | <b>Fraction</b> | <b>Source</b> | <b>CAS number</b> | <b>Type of molecule</b>         |
|------------------------------------------------------|-----------------|---------------|-------------------|---------------------------------|
| Cordycepin                                           | -               | Phytolab      | 73-03-0           | nucleoside derivative           |
| Californidine perchlorate                            | -               | Phytolab      | 17939-31-0        | tropanic alkaloid               |
| Costunolide                                          | -               | Phytolab      | 553-21-9          | sesquiterpene lactone           |
| Capsaicin                                            | -               | Phytolab      | 404-86-4          | aliphatic amide                 |
| Ginkgolic acid C13:0                                 | -               | Phytolab      | 20261-38-5        | annacardic acid derivative      |
| Tanshinone I                                         | -               | Phytolab      | 568-73-0          | diterpene                       |
| Rutaecarpine                                         | -               | Phytolab      | 84-26-4           |                                 |
| Palmatine chloride                                   | -               | Phytolab      | 10605-02-4        | benzylisoquinoline alkaloid     |
| (+)-Bicuculline                                      | -               | Phytolab      | 485-49-4          | phthalide-isoquinoline alkaloid |
| Ajmalicine                                           | -               | Phytolab      | 483-04-5          | benzylisoquinoline alkaloid     |
| Canadine                                             | -               | Phytolab      | 522-97-4          | benzylisoquinoline alkaloid     |
| Aloe emodin                                          | -               | Phytolab      | 481-72-1          | anthraquinone                   |
| Dodeca 2E,4E,8Z,10E,Z- tetraenoic acid isobutylamide | -               | Phytolab      | 866602-52-0       | isobutylamide                   |
| Ginkgolic acid C15:1                                 | -               | Phytolab      | 22910-60-7        | annacardic acid derivative      |
| Tanshinone IIA                                       | -               | Phytolab      | 568-72-9          | diterpene                       |
| Sarsasapogenin                                       | -               | Phytolab      | 126-19-2          | saponin                         |
| Pennogenin tetraglycoside                            | -               | Phytolab      | 68124-04-9        | saponin                         |
| Trigonelline chloride                                | -               | Phytolab      | 6138-41-6         | pyridine alkaloid               |
| L-(±)-Alliin                                         | -               | Phytolab      | 17795-26-5        | sulfoxide derivative            |
| N-Vanillylnonamide                                   | -               | Phytolab      | 2444-46-4         | Amide                           |
| Dehydroandrographolide                               | -               | Phytolab      | 134418-28-3       | diterpene                       |
| Embelin                                              | -               | Phytolab      | 550-24-3          | benzoquinone                    |
| Ginkgolic acid C17:1                                 | -               | Phytolab      | 111047-30-4       | annacardic acid derivative      |
| Tetrahydropalmatine                                  | -               | Phytolab      | 2934-97-6         | benzylisoquinoline alkaloid     |
| 6-Shogaol                                            | -               | Phytolab      | 555-66-8          | Vanilloid derivative            |
| Jatrorrhizine chloride                               | -               | Phytolab      | 6681-15-8         | benzylisoquinoline alkaloid     |

| <b>Name</b>                             | <b>Fraction</b> | <b>Source</b> | <b>CAS number</b> | <b>Type of molecule</b>     |
|-----------------------------------------|-----------------|---------------|-------------------|-----------------------------|
| Trillin                                 | -               | Phytolab      | 14144-06-0        |                             |
| Withaferin A                            | -               | Phytolab      | 5119-48-2         | steroidal lactone           |
| Chelerythrine                           | -               | Phytolab      | 34316-15-9        | benzylisoquinoline alkaloid |
| Dehydrocostus lactone                   | -               | Phytolab      | 477-43-0          | sesquiterpene lactone       |
| Epoxybergamottin                        | -               | Phytolab      | 206978-14-5       | coumarin                    |
| Gramine                                 | -               | Phytolab      | 87-52-5           | indole alkaloid             |
| Tomatidine hydrochloride                | -               | Phytolab      | 6192-62-7         | triterpene                  |
| Physcion                                | -               | Phytolab      | 521-61-9          | anthraquinone               |
| Linderalactone                          | -               | Phytolab      | 728-61-0          | sesquiterpene lactone       |
| Urushiol (15:1)                         | -               | Phytolab      | 35237-02-6        | cardol derivative           |
| Andrograpanin                           | -               | Phytolab      | 82209-74-3        | diterpene                   |
| Chelidonic Acid                         | -               | Phytolab      | 99-32-1           | pyran derivative            |
| 14-Deoxy 11,14-didehydroandrographolide | -               | Phytolab      | 42895-58-9        | diterpene                   |
| Eugenitin                               | -               | Phytolab      | 480-12-6          | chromone derivative         |
| Harmine                                 | -               | Phytolab      | 442-51-3          | indol alkaloid              |
| Trans-Sinapic acid                      | -               | Phytolab      | 7362-37-0         | phenyl propane derivative   |
| Piperine                                | -               | Phytolab      | 94-62-2           | Amide                       |
| Linderane                               | -               | Phytolab      | 13476-25-0        | sesquiterpene lactone       |
| Urushiol (15:2)                         | -               | Phytolab      | 83258-37-1        | cardol derivative           |
| Andrographolide                         | -               | Phytolab      | 5508-58-7         | diterpene                   |
| Chelidonine                             | -               | Phytolab      | 476-32-4          | benzylisoquinoline alkaloid |
| 12-Deoxywithastramonolide               | -               | Phytolab      | 60124-17-6        | steroidal lactone           |
| Formosanin C                            | -               | Phytolab      | 50773-42-7        | saponin                     |
| Hydrastine                              | -               | Phytolab      | 118-08-1          | benzylisoquinoline alkaloid |
| Sweroside                               | -               | Phytolab      | 14215-86-2        | secoiridoid                 |
| 10-Gingerol                             | -               | Phytolab      | 23513-15-7        | Vanilloid derivative        |
| quercetrin-4'-O-Glucoside               | -               | Phytolab      | 20229-56-5        | flavonoide                  |

| <b>Name</b>                       | <b>Fraction</b> | <b>Source</b>            | <b>CAS number</b> | <b>Type of molecule</b> |
|-----------------------------------|-----------------|--------------------------|-------------------|-------------------------|
| Solasodine                        | -               | Phytolab                 | 126-17-0          | triterpene              |
| Yamogenin                         | -               | Phytolab                 | 512-06-1          | triterpene              |
| Diosgenin                         | -               | Phytolab                 | 512-04-9          | triterpene              |
| Sinigrin potassium salt           | -               | Phytolab                 | 3952-98-5         | glucosinolate           |
| medicagenic acid                  | -               | Phytolab                 | 599-07-5          | aglycone                |
| 1,9-Pyrazoloanthrone              | -               | Sigma                    | 129-56-6          | anthrone derivative     |
| pyridoxatin                       | -               | Sigma                    | 135529-30-5       | alkaloid                |
| sahandinone                       | -               | Salvia sahendica         | -                 | diterpenoids            |
| 12-deoxy-salvipisone              | -               | Salvia sahendica         | -                 | diterpenoids            |
| 7 $\alpha$ -Acetoxyroyleanone     | -               | Salvia sahendica         | -                 | diterpenoids            |
| sahandone                         | -               | Salvia sahendica         | -                 | diterpenoids            |
| Ferruginol                        | -               | Salvia sahendica         | -                 | diterpenoids            |
| cryptotanshinone                  | -               | Perovskia atriplicifolia | -                 | diterpenoids            |
| PAR 13-5 (Isograndifoliol)        | -               | Perovskia atriplicifolia | -                 | diterpenoids            |
| PAR-8 (1hydroxy-cryptotanshinone) | -               | Perovskia atriplicifolia | -                 | diterpenoids            |
| Fathaian-1                        | -               | Hymenocrater elegans     | -                 | diterpenoids            |
| Fathaian-12-7                     | -               | Hymenocrater elegans     | -                 | diterpenoids            |
| Fathaian-3                        | -               | Hymenocrater elegans     | -                 | diterpenoids            |
| Fathaian-F6                       | -               | Hymenocrater elegans     | -                 | diterpenoids            |
| Fathaian-F7                       | -               | Hymenocrater elegans     | -                 | diterpenoids            |
| Fathaian-F10                      | -               | Hymenocrater elegans     | -                 | diterpenoids            |
| Fathaian-F9                       | -               | Hymenocrater elegans     | -                 | diterpenoids            |
| SLE-G1                            | -               | Salvia leriifolia        | -                 | diterpenoids            |
| SLE-E5                            | -               | Salvia leriifolia        | -                 | diterpenoids            |
| SLE-D4                            | -               | Salvia leriifolia        | -                 | diterpenoids            |
| SLE-F3                            | -               | Salvia leriifolia        | -                 | diterpenoids            |
| SLE-D1                            | -               | Salvia leriifolia        | -                 | diterpenoids            |

| Name                                                                                                                                                  | Fraction | Source                  | CAS number  | Type of molecule    |
|-------------------------------------------------------------------------------------------------------------------------------------------------------|----------|-------------------------|-------------|---------------------|
| SLE-B1 (taxodion)                                                                                                                                     | -        | Salvia leriifolia       | -           | diterpenoids        |
| SLE-E9                                                                                                                                                | -        | Salvia leriifolia       | -           | diterpenoids        |
| SLE-F2 (nemerone)                                                                                                                                     | -        | Salvia leriifolia       | -           | diterpenoids        |
| SLH-33-H13 (lupeol)                                                                                                                                   | -        | Salvia leriifolia       | -           | triterpenoids       |
| SLH-16-F1 (3b-Acetoxy-1b-hydroxy-lupeol) new                                                                                                          | -        | Salvia leriifolia       | -           | triterpenoids       |
| SLH-13-E15 (3BETA-Acetoxy lupan 20 -ol)                                                                                                               | -        | Salvia leriifolia       | -           | diterpenoids        |
| SLH-14-E15 (3b-Acetoxy lupan-20-ol)                                                                                                                   | -        | Salvia leriifolia       | -           | triterpenoids       |
| SLH-15-E16 (3BETA-Acetoxy lupan 20 -ol)                                                                                                               | -        | Salvia leriifolia       | -           | triterpenoids       |
| SLH-3-C (Taxodion)                                                                                                                                    | -        | Salvia leriifolia       | -           | diterpenoids        |
| SLH-17-D                                                                                                                                              | -        | Salvia leriifolia       | -           | diterpenoids        |
| Waltherione M                                                                                                                                         | 339      | <i>Waltheria Indica</i> | -           | quinolone alkaloids |
| Waltherione N                                                                                                                                         | 321-A    | <i>Waltheria Indica</i> | -           | quinolone alkaloids |
| (R)-Vanessine                                                                                                                                         | 321-B    | <i>Waltheria Indica</i> | -           | quinoline alkaloids |
| Waltherione P                                                                                                                                         | 353      | <i>Waltheria Indica</i> | -           | quinoline alkaloids |
| Waltherione O                                                                                                                                         | 355      | <i>Waltheria Indica</i> | -           | quinolone alkaloids |
| Waltherione Q                                                                                                                                         | 369-B    | <i>Waltheria Indica</i> | -           | quinolone alkaloids |
| antidesmone                                                                                                                                           | -        | <i>Waltheria Indica</i> | -           | quinoline alkaloids |
| waltherione I                                                                                                                                         | -        | <i>Waltheria Indica</i> | -           | quinoline alkaloids |
| waltherione J                                                                                                                                         | -        | <i>Waltheria Indica</i> | -           | quinoline alkaloids |
| waltherione L                                                                                                                                         | -        | <i>Waltheria Indica</i> | -           | quinoline alkaloids |
| waltherione H                                                                                                                                         | -        | <i>Waltheria Indica</i> | -           | quinoline alkaloids |
| waltherione K                                                                                                                                         | -        | <i>Waltheria Indica</i> | -           | quinoline alkaloids |
| Flindersine                                                                                                                                           | -        |                         | 523-64-8    |                     |
| 8-methoxyflindersine                                                                                                                                  | -        |                         | 35989-00-5  |                     |
| Ergost-2-en-26-oic acid, 4-(acetyloxy)-5,6:18,20-diepoxy-18,22-dihydroxy-1-oxo-, $\delta$ -lactone, (4 $\beta$ ,5 $\beta$ ,6 $\beta$ ,22R,25R)- (9CI) | -        | Dunalia brachyacantha   | 240809-75-0 | Withanolides        |
| 3-hydroxy-Norvaline                                                                                                                                   | -        |                         | 2280-42-4   | Amino acid derivate |



| <b>Name</b>                                                                                                 | <b>Fraction</b> | <b>Source</b>            | <b>CAS number</b> | <b>Type of molecule</b>      |
|-------------------------------------------------------------------------------------------------------------|-----------------|--------------------------|-------------------|------------------------------|
| Phomalone                                                                                                   | -               | <i>Phoma etheridgei</i>  | 159768-89-5       | phenolic derivative          |
| 4a,5,6,7,8,8a-hexahydro-4-hydroxy-4-(hydroxymethyl)-3,4a,8,8-tetramethyl-, (4R,4aS,8aS)-1(4H)-Naphthalenone | -               | <i>Aspergillus ustus</i> | 127681-58-7       | Drimane sesquiterpenoids     |
| flindulatin                                                                                                 | -               | <i>Waltheria Indica</i>  | New               | polyhydroxymethoxyflavonoids |
| Oxyanin A                                                                                                   | -               | <i>Waltheria Indica</i>  | New               | polyhydroxymethoxyflavonoids |
| Chrysosplenol E                                                                                             | -               | <i>Waltheria Indica</i>  | -                 | polyhydroxymethoxyflavonoids |
| Vitexicarpin                                                                                                | -               | <i>Waltheria Indica</i>  | -                 | polyhydroxymethoxyflavonoids |
| 5-Hydroxy-3,4',7-trimethoxyflavone                                                                          | -               | <i>Waltheria Indica</i>  | New               | polyhydroxymethoxyflavonoids |

**Table S2: List of strains used in this study**

| Strain  | Species                | Parental strain    | Plasmid used  | Genotype                                                                             | Reference  |
|---------|------------------------|--------------------|---------------|--------------------------------------------------------------------------------------|------------|
| SC5314  | <i>C. albicans</i>     | -                  | -             | wild-type                                                                            | (1)        |
| CAF2-1  | <i>C. albicans</i>     | SC5314             |               | <i>URA3/ura3Δ::imm434 IRO1/iro1Δ::imm434</i>                                         | (2)        |
| DSY731  | <i>C. albicans</i>     |                    |               | Azole-susceptible clinical isolate                                                   | (3)        |
| DSY732  | <i>C. albicans</i>     | related to DSY731  |               | Azole-resistant clinical isolate                                                     | (3)        |
| DSY1841 | <i>C. albicans</i>     |                    |               | Azole-susceptible clinical isolate                                                   | (4)        |
| DSY1843 | <i>C. albicans</i>     | related to DSY1841 |               | Azole-resistant clinical isolate                                                     | (4)        |
| SDY1    | <i>C. albicans</i>     | SC5314             | pSD1          | <i>erg6Δ::SAT1::FRT/ERG6</i>                                                         | this study |
| SDY4    | <i>C. albicans</i>     | SDY1               | PSD3          | <i>erg6Δ::FRT/erg6Δ::SAT1::FRT</i>                                                   | this study |
| DSY446  | <i>C. albicans</i>     | CAF4.2             |               | <i>cdr1Δ::hisG-URA3-hisG/CDR1</i>                                                    | (5)        |
| DSY448  | <i>C. albicans</i>     | CAF4.2             |               | <i>cdr1Δ::hisG-URA3-hisG/cdr1Δ::hisG</i>                                             | (5)        |
| DSY649  | <i>C. albicans</i>     | CAF4.2             |               | <i>cdr2Δ::hisG-URA3-hisG/CDR2</i>                                                    | (6)        |
| DSY653  | <i>C. albicans</i>     | CAF4.2             |               | <i>cdr2Δ::hisG-URA3-hisG/cdr1Δ::hisG</i>                                             | (6)        |
| DSY463  | <i>C. albicans</i>     | CAF4.2             |               | <i>benΔ::hisG-URA3-hisG/BEN</i>                                                      | (5)        |
| DSY465  | <i>C. albicans</i>     | CAF4.2             |               | <i>benΔ::hisG-URA3-hisG/benΔ::hisG</i>                                               | (5)        |
| DSY471  | <i>C. krusei</i>       |                    |               | ATCC 6258                                                                            | -          |
| DSY472  | <i>C. tropicalis</i>   |                    |               | ATCC 75                                                                              | -          |
| DSY473  | <i>C. parapsiopsis</i> |                    |               | ATCC 22019                                                                           | -          |
| DSY562  | <i>C. glabrata</i>     |                    |               | Azole-susceptible clinical isolate                                                   | (7)        |
| DSY565  | <i>C. glabrata</i>     | related to DSY 562 |               | Azole-resistant clinical isolate                                                     | (7)        |
| S288C   | <i>S. cerevisiae</i>   |                    |               | <i>MAT<math>\alpha</math> SUC2 gal2 mal2 mel flo1 flo8-1 hap1 ho bio1 bio6</i>       | -          |
| BY4741  | <i>S. cerevisiae</i>   | S288C              |               | <i>MAT<math>\alpha</math> his3Δ1 leu2Δ0 met15Δ0 ura3Δ0</i>                           | -          |
| DSY4743 | <i>S. cerevisiae</i>   | BY4741             |               | <i>MAT<math>\alpha</math> his3Δ1 leu2Δ0 met15Δ0 ura3Δ0 pdr5Δ::kanMX4</i>             | Euroscarf  |
| DSY5103 | <i>S. cerevisiae</i>   | BY4741             |               | <i>MAT<math>\alpha</math> ura3Δ0 leu2Δ0 his3Δ1 met15Δ0 ace2Δ::kanMX4</i>             | Euroscarf  |
| P1      | <i>S. cerevisiae</i>   | DSY4743            | pFa6a-His3MX6 | <i>MAT<math>\alpha</math> his3Δ1 leu2Δ0 met15Δ0 ura3Δ0 pdr5Δ::kanMX4 msh2Δ::HIS3</i> | this study |
| IMX581  | <i>S. cerevisiae</i>   | CEN.PK113-7D       |               | <i>MAT<math>\alpha</math> can1::cas9-natNT2 ura3-52 TRP1 LEU2 HIS3</i>               | (8)        |
| G132D   | <i>S. cerevisiae</i>   | IMX581             |               | <i>MAT<math>\alpha</math> can1::cas9-natNT2 ura3-52 TRP1 LEU2 HIS3 erg6-G132D</i>    | this study |

|        |                      |        |  |                                                                                                                                                                                |            |
|--------|----------------------|--------|--|--------------------------------------------------------------------------------------------------------------------------------------------------------------------------------|------------|
| D249G  | <i>S. cerevisiae</i> | IMX581 |  | MAT $\alpha$ <i>can1::cas9-natNT2 ura3-52 TRP1 LEU2 HIS3 erg6-D249G</i>                                                                                                        | this study |
| RH4237 | <i>S. cerevisiae</i> | RH448  |  | MAT $\alpha$ <i>erg6<math>\Delta</math>::LEU2 his4<math>\Delta</math>1 leu2<math>\Delta</math>0 lys2<math>\Delta</math>0 bar1<math>\Delta</math>0 ura3<math>\Delta</math>0</i> | (9)        |
| RH4217 | <i>S. cerevisiae</i> | RH448  |  | MAT $\alpha$ <i>erg4<math>\Delta</math>::URA3 his4<math>\Delta</math>1 leu2<math>\Delta</math>0 lys2<math>\Delta</math>0 bar1<math>\Delta</math>0 ura3<math>\Delta</math>0</i> | (9)        |

**Table S3: Primers and plasmids used in this study**

| Primer name             | Sequence (5'->3')                                                                                                               | Description                                          |
|-------------------------|---------------------------------------------------------------------------------------------------------------------------------|------------------------------------------------------|
| For_msh2_Sc             | TTATCTGCTGACCTAACATCAAATCCTCAGATTAAGTTCGGATCCCCGGGTTAATTAA                                                                      | Deletion of MSH2 (pFa6a-His3MX6)                     |
| Rev_msh2_Sc             | TATCTATCGATTCTCACTTAAGATGTCGTTGTAATATTAAGAATTCGAGCTCGTTTAAAC                                                                    | Deletion of MSH2 (pFa6a-His3MX6)                     |
| p426_CRISPR_rv          | GATCATTATCTTTCACTGCGGAGAAG                                                                                                      | Amplification pMel10 linear fragment                 |
| p426_CRISPR_fw          | GTTTTAGAGCTAGAAATAGCAAGTTAAATAAGGCTAGTC                                                                                         | Amplification pMel10 linear fragment                 |
| ERG6_cri_gRNA_For       | TGCGCATGTTTCGGCGTTCGAAACTTCTCCGCAGTGAAAGATAAATGATCTGTTCCATGTCGA<br>CGTGGCTGTTTTAGAGCTAGAAATAGCAAGTTAAATAAGGCT<br>AGTCCGTTATCAAC | Construction of guideRNA for D249G                   |
| ERG6_cri_gRNA_Rev       | GTTGATAACGGACTAGCCTTATTTAACTTGCTATTTCTAGCTCTAAAACAGCCACGTCGACAT<br>GGAACAGATCATTATCTTTCACTGCGGAGAAGTTTCGAACGCCGAAACATGCGCA      | Construction of guideRNA for D249G                   |
| ERG6_cri_gRNA_For2      | TGCGCATGTTTCGGCGTTCGAAACTTCTCCGCAGTGAAAGATAAATGATCAGAGAGATTGCA<br>AGATTTACGTTTTAGAGCTAGAAATAGCAAGTTAAATAAGGCTAGTCCGTTATCAAC     | Construction of guideRNA for mutation G132D          |
| ERG6_cri_gRNA_Rev2      | GTTGATAACGGACTAGCCTTATTTAACTTGCTATTTCTAGCTCTAAAACGTAATCTTGCAAT<br>CTCTCTGATCATTATCTTTCACTGCGGAGAAGTTTCGAACGCCGAAACATGCGCA       | Construction of guideRNA for mutation G132D          |
| ERG6_cri_rep_160a_For   | ATATGACGAAAACAATCCTGAACATAGAAAGATCGCTTATGAAATTGAACTAGGTGGTGG                                                                    | Construction of repair fragment for D249G            |
| ERG6_cri_rep_160bs_For  | TAGGTGGTGGTATCCCAAAGATGTCCATGTGCATGTGGCTAGGAAAGCATTGAAGAACT                                                                     | Construction of repair fragment for D249G            |
| ERG6_cri_rep_160c_Rev   | TCATCATCATTGTCCGCCAGGTCTTCGTAACGAGGACTTCGAAACCACAGTTCTTCAAT                                                                     | Construction of repair fragment for D249G            |
| ERG6_cri_rep_160a_For2  | AGCTTACAAGGCTGGTATTCAAAGAGGCGATTTAGTTCTCGACGTTGGTTGTGGTGTGG                                                                     | Construction of repair fragment for G132D            |
| ERG6_cri_rep_160bs_For2 | GTGGTGTGGGGACCCAGCAAGAGAGATTGCTAGATTTACGGTTGTAACGCATCGGTC                                                                       | Construction of repair fragment for G132D            |
| ERG6_cri_rep_160c_Rev2  | TTTTTAGCGTAATATTTGCGCTTGCCAATTTGTAATCGTTATTGTTTAGACCGATGACG                                                                     | Construction of repair fragment for G132D            |
| Erg6_verif_for          | GAGTTTCGCTGCCTCGATAG                                                                                                            | Sequencing primer for G132D                          |
| Erg6_verif_rev          | TCATTGTCCGCCAGGTCTTC                                                                                                            | Sequencing primer for D249G                          |
| ERG6_5For_KPN1          | CGCGGTACCACAACGATCTATTCTTCTCG                                                                                                   | Deletion of <i>ERG6</i> first allele (pSD1 and pSD4) |
| ERG6_5Rev_Xho1          | CGCCTCGAGGTTAATGAGTTGAATCTTAG                                                                                                   | Deletion of <i>ERG6</i> first allele (pSD1 and pSD4) |
| ERG6_3For_SacII         | CGCCCGCGGCGTGTATCTATTCATAGAGG                                                                                                   | Deletion of <i>ERG6</i> first allele (pSD1)          |
| ERG6_3Rev_SacI          | CGCGAGCTCGACATTGATAAGGCTAAGAG                                                                                                   | Deletion of <i>ERG6</i> first allele (pSD1)          |
| ERG6_3CDSFor_SacII      | CGCCCGCGGAGATTTGGCTGATGTTGATG                                                                                                   | Deletion of <i>ERG6</i> second allele (pSD4)         |
| ERG6_3CDSRev_SacI       | CGCGAGCTCCCCAACATAAACTCACCTG                                                                                                    | Deletion of <i>ERG6</i> second allele (pSD4)         |
| ACT1_for                | GCATCACACTTTTTACAAT                                                                                                             | qPCR                                                 |
| ACT1_rev                | AAACATAATTTGAGTCATCTTT                                                                                                          | qPCR                                                 |

| Primer name | Sequence (5'->3')                    | Description |
|-------------|--------------------------------------|-------------|
| ACT1_probe  | FAM-TTGCTCCAGAAGAACATCCAGT-TAMRA     | qPCR        |
| ERG4_for    | TCAAATGTGCCAATGGTTCT                 | qPCR        |
| ERG4_rev    | AGCCCAAGTCAATGTTTGAA                 | qPCR        |
| ERG4_probe  | FAM- TCTGGCATAAACGTACCACCCATCA-TAMRA | qPCR        |
| ERG6_for    | ATGAACATTTCTTGCCCAT                  | qPCR        |
| ERG6_rev    | CCAACAATTTCAATCAGTAAATC              | qPCR        |
| ERG6_probe  | FAM-CCAGGACCACCTACACCACAACCA-TAMRA   | qPCR        |
| ERG11_for   | ATTGTTGAAACTGTCATTG                  | qPCR        |
| ERG11_rev   | CCCCTAATAATACTGATCTG                 | qPCR        |
| ERG11_probe | FAM- TTTGTCCCTTAGTGTTACACA-TAMRA     | qPCR        |
| CDR1_for    | ATGACTCGAGATATTTTGATA                | qPCR        |
| CDR1_rev    | TTAACAGCAATGGTCTTTA                  | qPCR        |
| CDR1_probe  | FAM-CATTATGAGACCTGGTGAACCTACT-TAMRA  | qPCR        |
| CDR2_for    | TAGATATTTGAGCCACATG                  | qPCR        |
| CDR2_rev    | TTGGCATTGAAATTTTCG                   | qPCR        |
| CDR2_probe  | FAM- TTAGTCCATTCAACGGCAACATTAG-TAMRA | qPCR        |

| Plasmid       | Characteristics                                                               | Reference |
|---------------|-------------------------------------------------------------------------------|-----------|
| pSD1          | 5'-UTR and 3'-UTR of <i>CaERG6</i> into pSFS2a (KpnI,XhoI; SacI,SacII)        | (10)      |
| pSD4          | 5'-UTR and 3'-CDS end of <i>CaERG6</i> into pSFS2a (KpnI,XhoI; SacI,SacII)    | (10)      |
| pFa6a-His3MX6 | Plasmid carrying the <i>HIS3</i> selection marker, used to delete <i>MSH2</i> | (11)      |
| pMel10        | Plasmid carrying the <i>KIURA3</i> -selection marker, expression of gRNA      | (8)       |

**Table S4:** Activity of tomatidine against a collection of *Candida* spp.

| Species              | Strain <sup>a)</sup> | MIC <sup>b)</sup> |                     | MIC50           |                     | MIC90           |                     |
|----------------------|----------------------|-------------------|---------------------|-----------------|---------------------|-----------------|---------------------|
|                      |                      | Tomatidine (μM)   | Fluconazole (μg/ml) | Tomatidine (μM) | Fluconazole (μg/ml) | Tomatidine (μM) | Fluconazole (μg/ml) |
| <i>C. albicans</i>   | DSY227               | 0.625             | 0.5                 | 0.3125          | 0.5                 | 2.5             | 2                   |
|                      | DSY281               | 0.3125            | 0.5                 |                 |                     |                 |                     |
|                      | DSY285               | 0.3125            | 0.5                 |                 |                     |                 |                     |
|                      | DSY288               | 0.3125            | 1                   |                 |                     |                 |                     |
|                      | DSY290               | 2.5               | 0.5                 |                 |                     |                 |                     |
|                      | DSY294               | 0.3125            | 0.5                 |                 |                     |                 |                     |
|                      | DSY299               | 0.3125            | 0.25                |                 |                     |                 |                     |
|                      | DSY297               | 0.3125            | 2                   |                 |                     |                 |                     |
|                      | SC5314               | 0.625             | 0.5                 |                 |                     |                 |                     |
| <i>C. krusei</i>     | DSY2293              | 0.625             | 32                  | 1.25            | 32                  | >40             | 32                  |
|                      | DSY2294              | >40               | 32                  |                 |                     |                 |                     |
|                      | DSY2300              | 0.625             | 32                  |                 |                     |                 |                     |
|                      | DSY2302              | 1.25              | 32                  |                 |                     |                 |                     |
|                      | DSY2616              | >40               | 32                  |                 |                     |                 |                     |
|                      | DSY2617              | 1.25              | 32                  |                 |                     |                 |                     |
|                      | DSY2618              | 1.25              | 32                  |                 |                     |                 |                     |
|                      | DSY471               | 0.625             | 32                  |                 |                     |                 |                     |
| <i>C. tropicalis</i> | DSY381               | 0.3125            | 0.5                 | 1.25            | 8                   | 5               | 128                 |
|                      | DSY2274              | 2.5               | 2                   |                 |                     |                 |                     |
|                      | DSY2310              | 1.25              | 2                   |                 |                     |                 |                     |
|                      | DSY2336              | 1.25              | 16                  |                 |                     |                 |                     |
|                      | DSY2374              | 0.3125            | 8                   |                 |                     |                 |                     |
|                      | DSY2897              | 1.25              | 4                   |                 |                     |                 |                     |
|                      | DSY2825              | 5                 | 128                 |                 |                     |                 |                     |
|                      | DSY826               | 0.15              | 2                   |                 |                     |                 |                     |
|                      | DSY472               | 5                 | 128                 |                 |                     |                 |                     |

<sup>a)</sup> Strains are from the laboratory collection (“DSY” prefix). Strain identities were confirmed by MALDI-TOF approaches.

<sup>b)</sup> Tomatidine MICs were determined as described in Material and Methods with YNB buffered at pH 7.0. Fluconazole MICs were determined according to EUCAST protocols.



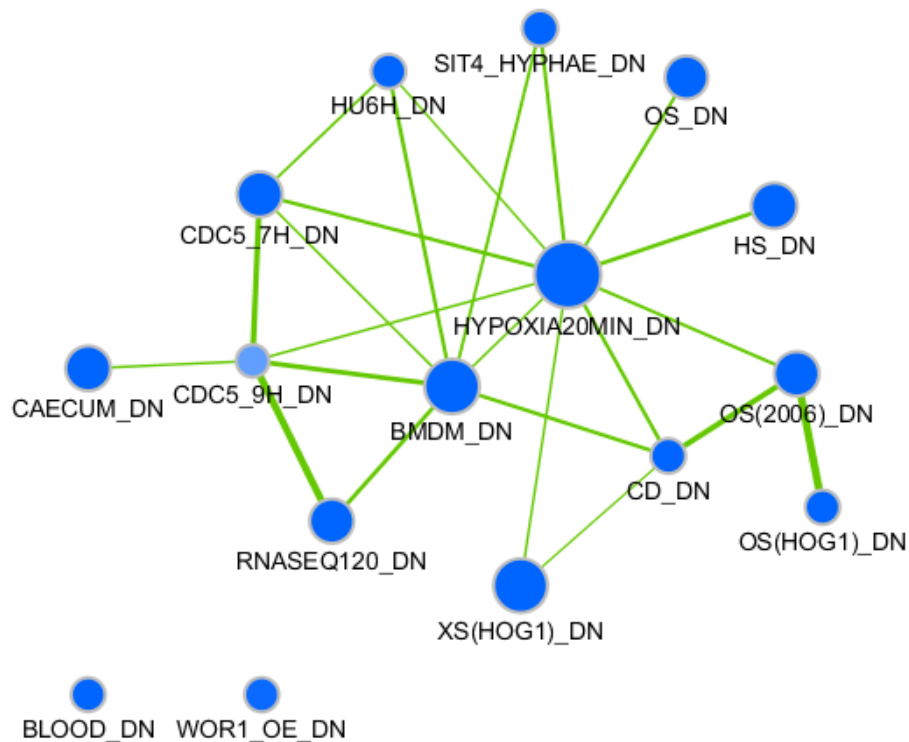

**Figure S2: Gene set enrichment analysis (GSEA) of *C. albicans* genes regulated by tomatidine with stress-related transcriptional data.**

The list of stress-regulated genes was adapted from published transcriptional data (12) (see supplementary file S2, *CandidaL\_exp\_dataL2mod.gmt*). Tomatidine regulated genes (3h) were ranked according to their fold-change. The list was then imported into the GSEA software. Analysis parameters were as follows: norm, meandiv; scoring\_scheme, weighted; set\_min, 15; nperm, 1000; set\_max, 500. GSEA results were uploaded into Cytoscape 3.0 with the following parameters: p-value cut-off, 0.01; FDR q-value, 0.05. Red nodes represent enriched gene lists in upregulated (UP) genes from the GSEA. Blue nodes represent enriched gene lists in downregulated (DN) genes from the GSEA. Nodes are connected by edges when overlaps exist between nodes. The size of nodes reflects the total number of genes that are connected by edges to neighbouring nodes. The labels of the list (*C. albicans* stress- and growth conditions) are indicated next to the nodes (details in Supplementary File S2).



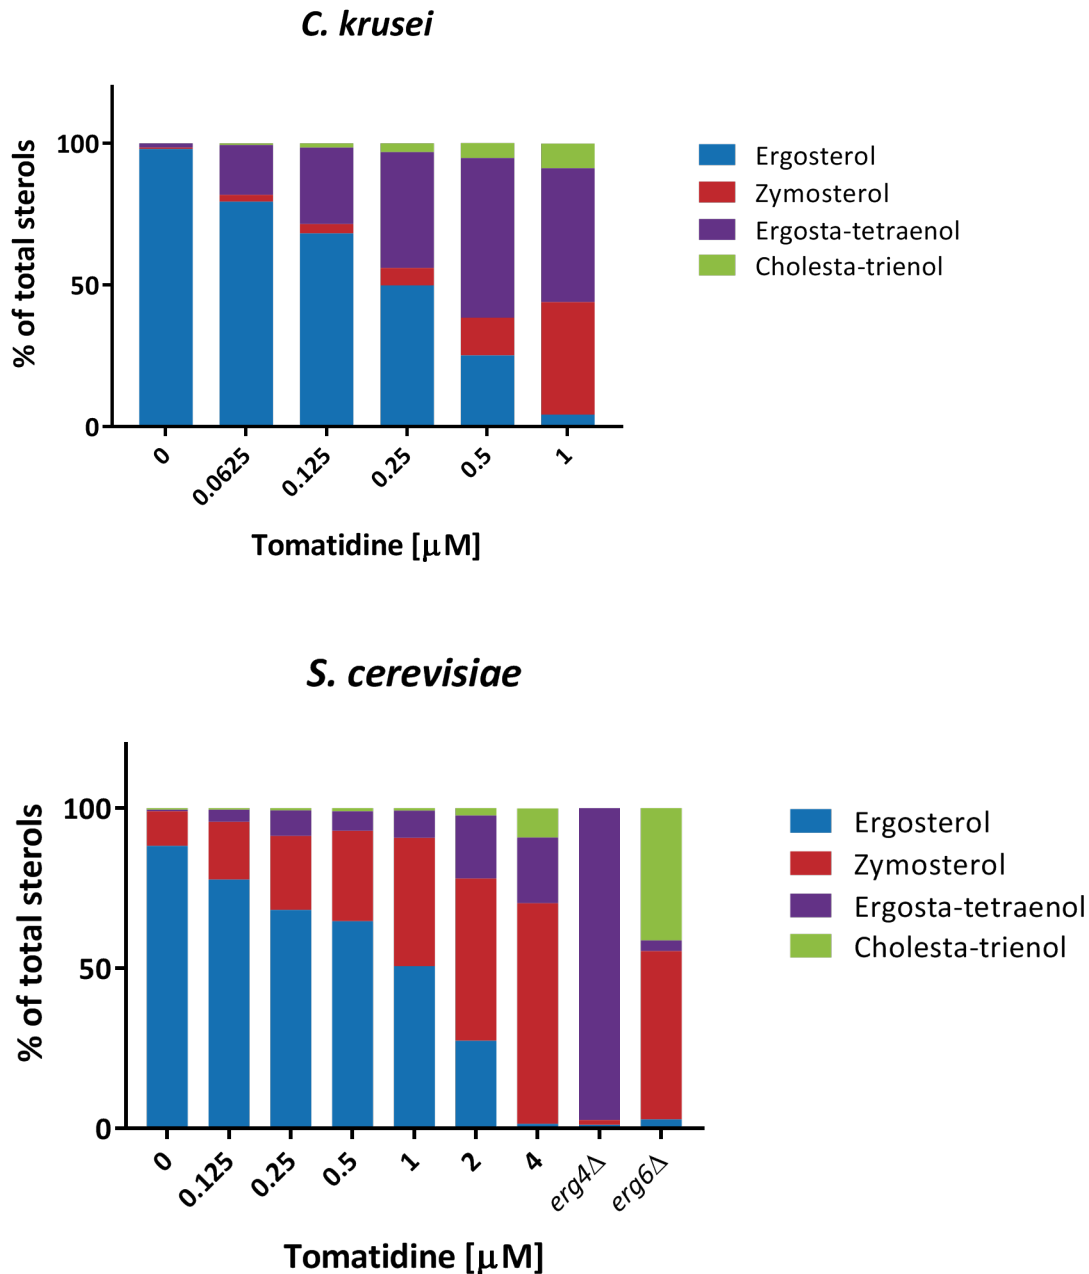

**Figure S3: GC-MS analysis of sterol contents of *C. krusei* and *S. cerevisiae* cells after tomatidine exposure.** GC-MS analysis of cells exposed to tomatidine with the percentage of the different sterols are shown in a bar plot. Bar colors correspond to sterol molecules illustrated in the left panel of Figure 3A where the last steps in the ergosterol biosynthetic pathway and an alternative pathway after Erg6 inhibition are shown. The sterol profiles of *S. cerevisiae* *erg4* $\Delta$  (RH4217) and *erg6* $\Delta$  (RH4237) mutants are also shown. Experiments were repeated (duplicates) and gave similar results.

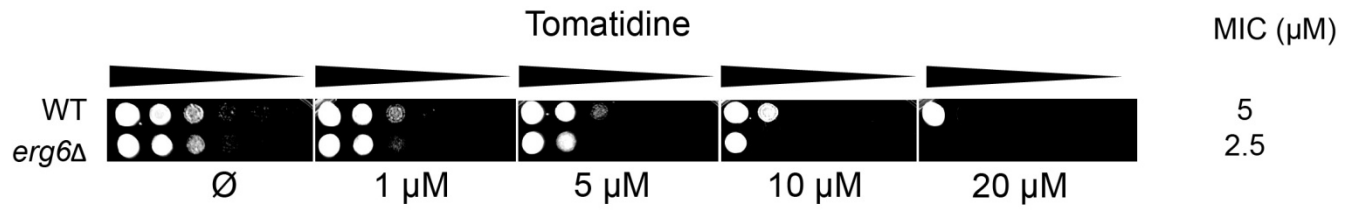

**Figure S4: Susceptibility assay of the *S. cerevisiae* *ERG6* deletion strain.**

WT (BY4741) and *erg6Δ* strain (RH4237) were subjected to serial dilution susceptibility assay on YPED plate containing indicated concentration of tomatidine and to standard MIC determination assay in YNB-CSM pH 7 media.

**A**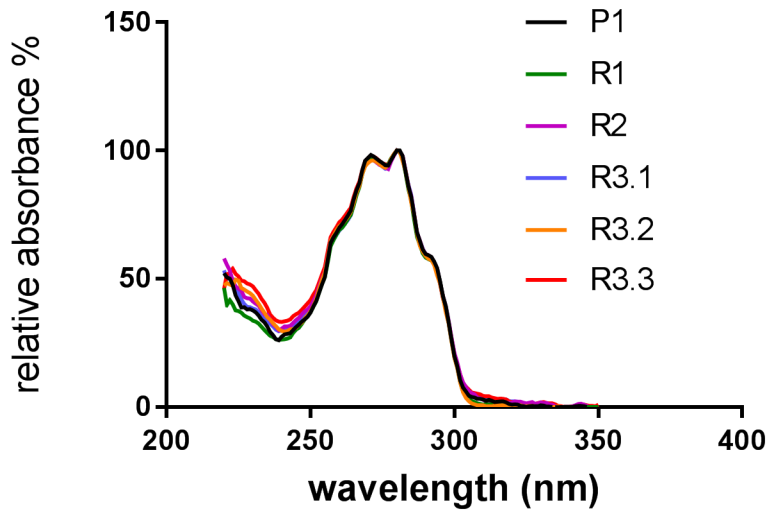**B**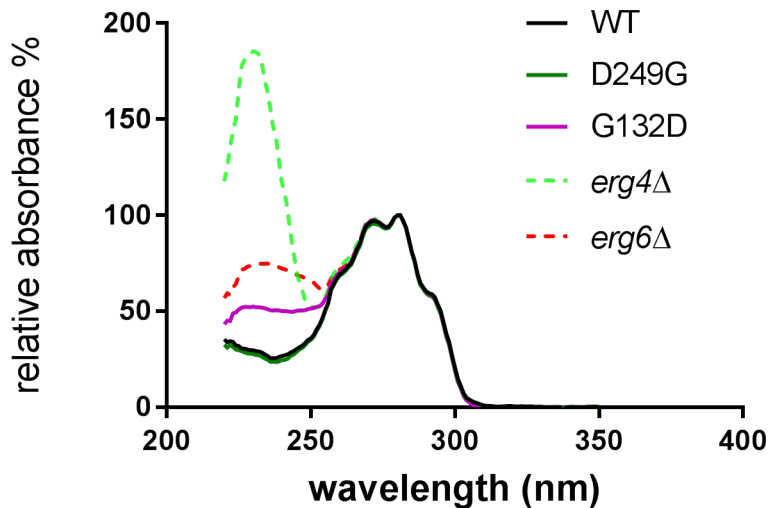

**Figure S5: UV spectrophotometric sterol profiles of tomatidine-resistant strains (A) and corresponding *ERG6* point-mutated strains (B).** *S. cerevisiae* cells were grown overnight in YPED media, sterol extracted and spectral profiles between 220 and 350 were determined (as described in Materials and Methods). To normalize the spectra, a relative absorbance was calculated with 100% absorbance corresponding to the 281 nm peak. Strains represented are: **(A)** Tomatidine-resistant strains and the parental susceptible strain; **(B)** WT (IMX581), the two *ERG6* point-mutated strains (D249G and G132D) and as control *erg6*Δ (RH4237) and *erg4*Δ (RH4217).

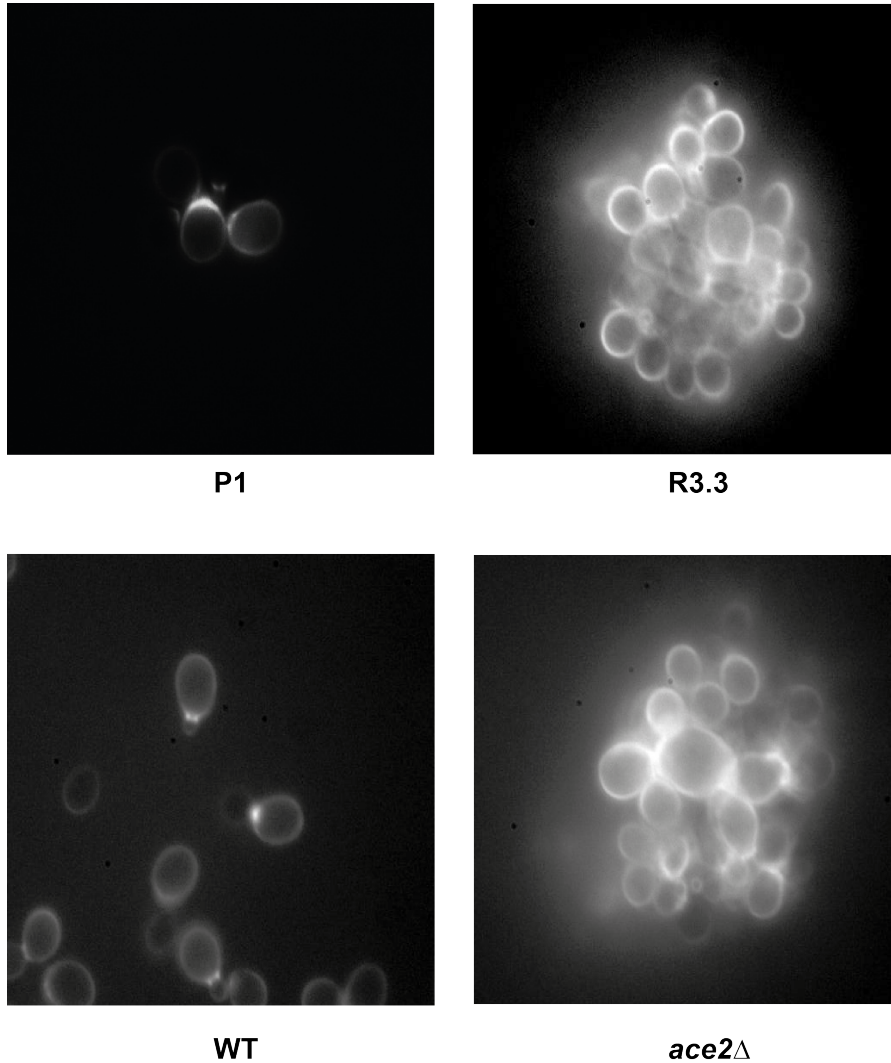

**Figure S6: Microscopic analysis of the effect of *ACE2* deletion on cell morphology.**

Samples were taken in exponential phase ( $OD_{540}$  0.4) from culture grown in YPED media and resuspended in PBS as described in Materials and Methods. Upper panel: Calcofluor White staining of parental strain P1 and tomatidine-resistant strain R3.3. P1 has a similar morphology to the wild type strain. Microscopic observation of R3.3 revealed a multicellular clumping phenotype typical for *ace2Δ* mutant as shown in the right lower panel. Images are representative for the entire culture.

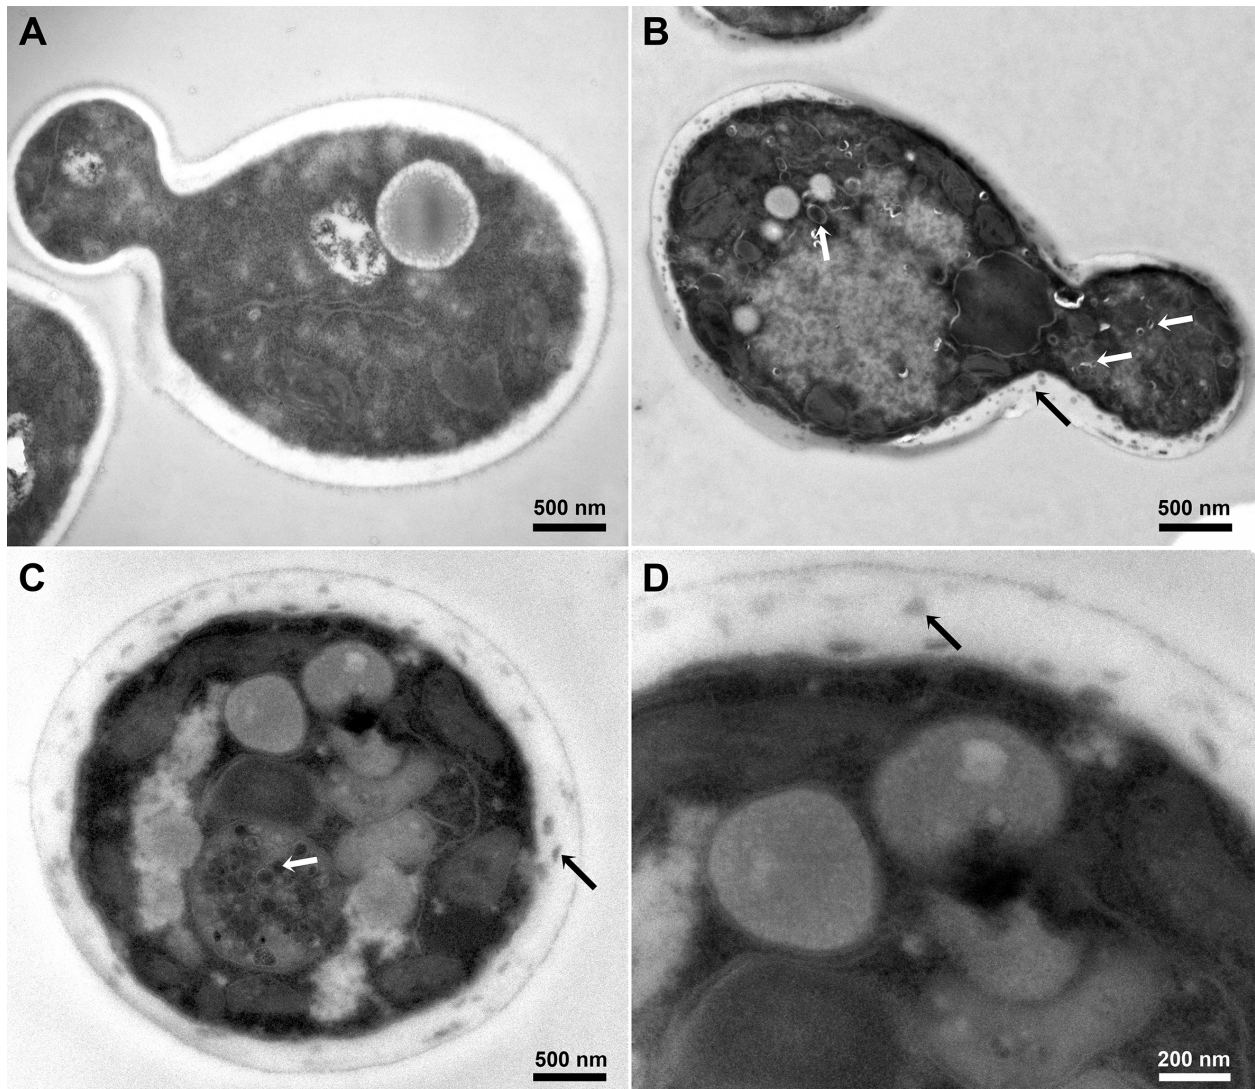

**Figure S7: Ultrastructure of *C. albicans* wild-type cells with and without treatment with tomatidine observed by transmission electron microscopy (TEM)**

**(A)** Control with DMSO treatment showing intact membrane, organelles, wall space and numerous ribosomal particles. **(B)** Cell treated with miconazole for 18 h. Black arrow shows dark material in the wall space and white arrows dark lipid-like corpuscles. **(C)** Cell treated with tomatidine (10  $\mu$ M) for 18 h. Black arrow shows dark material in the wall space and white arrow dark lipid-like corpuscles in a vacuole. **(D)** Details of C panel showing the dark material accumulating in the cell wall space.

## References

1. Gillum AM, Tsay EY, Kirsch DR. Isolation of the *Candida albicans* gene for orotidine-5'-phosphate decarboxylase by complementation of *S. cerevisiae* *ura3* and *E. coli* *pyrF* mutations. *Mol Gen Genet*. 1984;198(2):179-82.
2. Fonzi WA, Irwin MY. Isogenic strain construction and gene mapping in *Candida albicans*. *Genetics*. 1993;134(3):717-28.
3. Coste A, Selmecki A, Forche A, Diogo D, Bougnoux ME, d'Enfert C, et al. Genotypic evolution of azole resistance mechanisms in sequential *Candida albicans* isolates. *Eukaryot Cell*. 2007;6(10):1889-904.
4. White TC, Pfaller MA, Rinaldi MG, Smith J, Redding SW. Stable azole drug resistance associated with a substrain of *Candida albicans* from an HIV-infected patient. *Oral Dis*. 1997;3 Suppl 1:S102-9.
5. Sanglard D, Ischer F, Monod M, Bille J. Susceptibilities of *Candida albicans* multidrug transporter mutants to various antifungal agents and other metabolic inhibitors. *Antimicrob Agents Chemother*. 1996;40(10):2300-5.
6. Sanglard D, Ischer F, Monod M, Bille J. Cloning of *Candida albicans* genes conferring resistance to azole antifungal agents: characterization of CDR2, a new multidrug ABC transporter gene. *Microbiology*. 1997;143 ( Pt 2):405-16.
7. Sanglard D, Ischer F, Calabrese D, Majcherczyk PA, Bille J. The ATP binding cassette transporter gene *CgCDR1* from *Candida glabrata* is involved in the resistance of clinical isolates to azole antifungal agents. *Antimicrob Agents Chemother*. 1999;43(11):2753-65.
8. Mans R, van Rossum HM, Wijsman M, Backx A, Kuijpers NG, van den Broek M, et al. CRISPR/Cas9: a molecular Swiss army knife for simultaneous introduction of multiple genetic modifications in *Saccharomyces cerevisiae*. *FEMS Yeast Res*. 2015;15(2).
9. Friant S, Meier KD, Riezman H. Increased ubiquitin-dependent degradation can replace the essential requirement for heat shock protein induction. *EMBO J*. 2003;22(15):3783-91.
10. Reuss O, Vik A, Kolter R, Morschhauser J. The SAT1 flipper, an optimized tool for gene disruption in *Candida albicans*. *Gene*. 2004;341:119-27.
11. Longtine MS, McKenzie A, 3rd, Demarini DJ, Shah NG, Wach A, Brachat A, et al. Additional modules for versatile and economical PCR-based gene deletion and modification in *Saccharomyces cerevisiae*. *Yeast*. 1998;14(10):953-61.
12. Amorim-Vaz S, Tran Vdu T, Pradervand S, Pagni M, Coste AT, Sanglard D. RNA Enrichment Method for Quantitative Transcriptional Analysis of Pathogens In Vivo Applied to the Fungus *Candida albicans*. *MBio*. 2015;6(5):e00942-15.
